# Supplementary material
Source: Royal Society of Chemistry journal article supplement (doi:10.1039/d6su00222f)
Supplement: d6su00222f1.pdf [file d6su00222f1.pdf]

**Sustainable Green Epoxidation of Terpenes and other Olefins by Dioxirane Generated from H<sub>2</sub>O<sub>2</sub>**

Yacoub Mahamat Ahmat<sup>1</sup>, Malak El Kaddouri<sup>1,2</sup>, Louis Fradette<sup>3</sup>, Serge Kaliaguine<sup>1</sup>

<sup>1</sup>Department of Chemical Engineering, Laval University, Quebec City, Quebec Canada

<sup>2</sup>Euromed University of Fes, UEMF, Morocco

<sup>3</sup>Polytechnique Montreal, Montreal, Canada

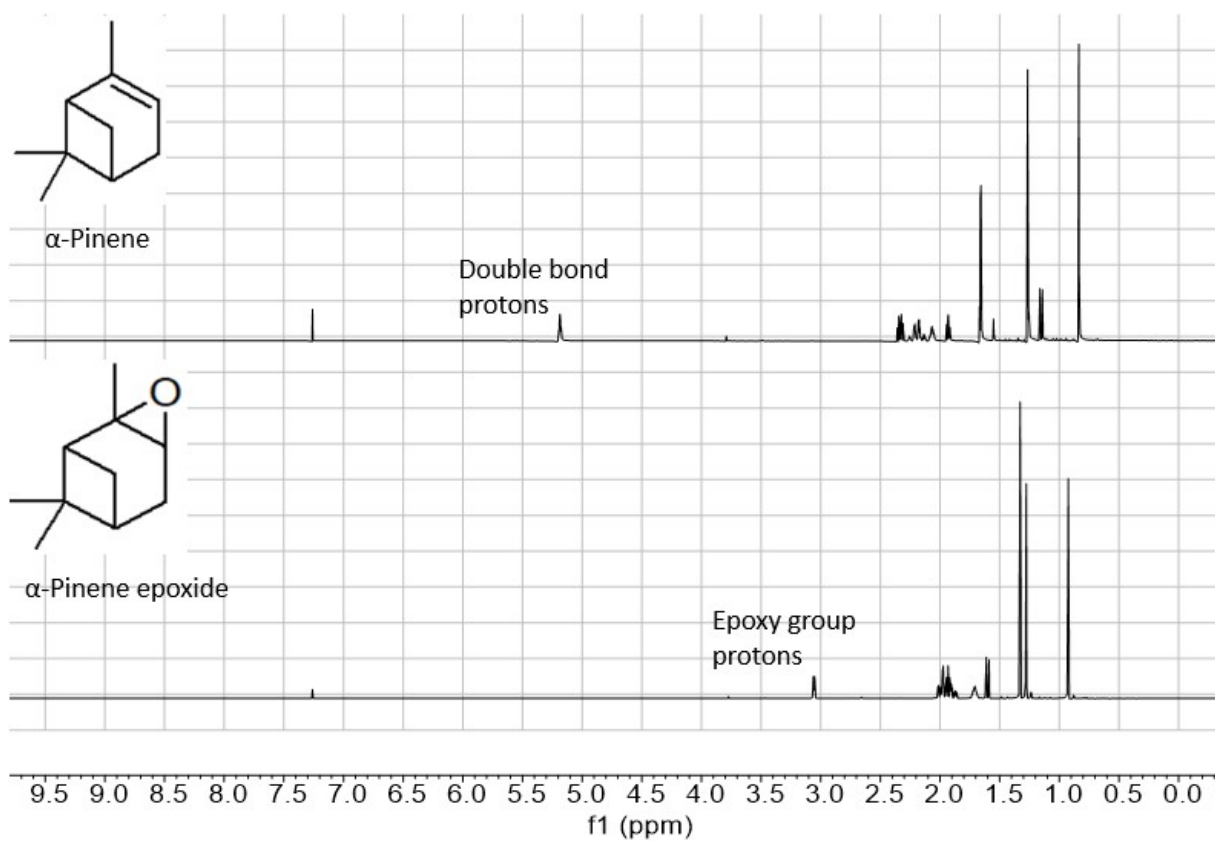

**Scheme S1.** Proton NMR of  $\alpha$ -pinene and its epoxidation product ( $\alpha$ -pinene epoxide)

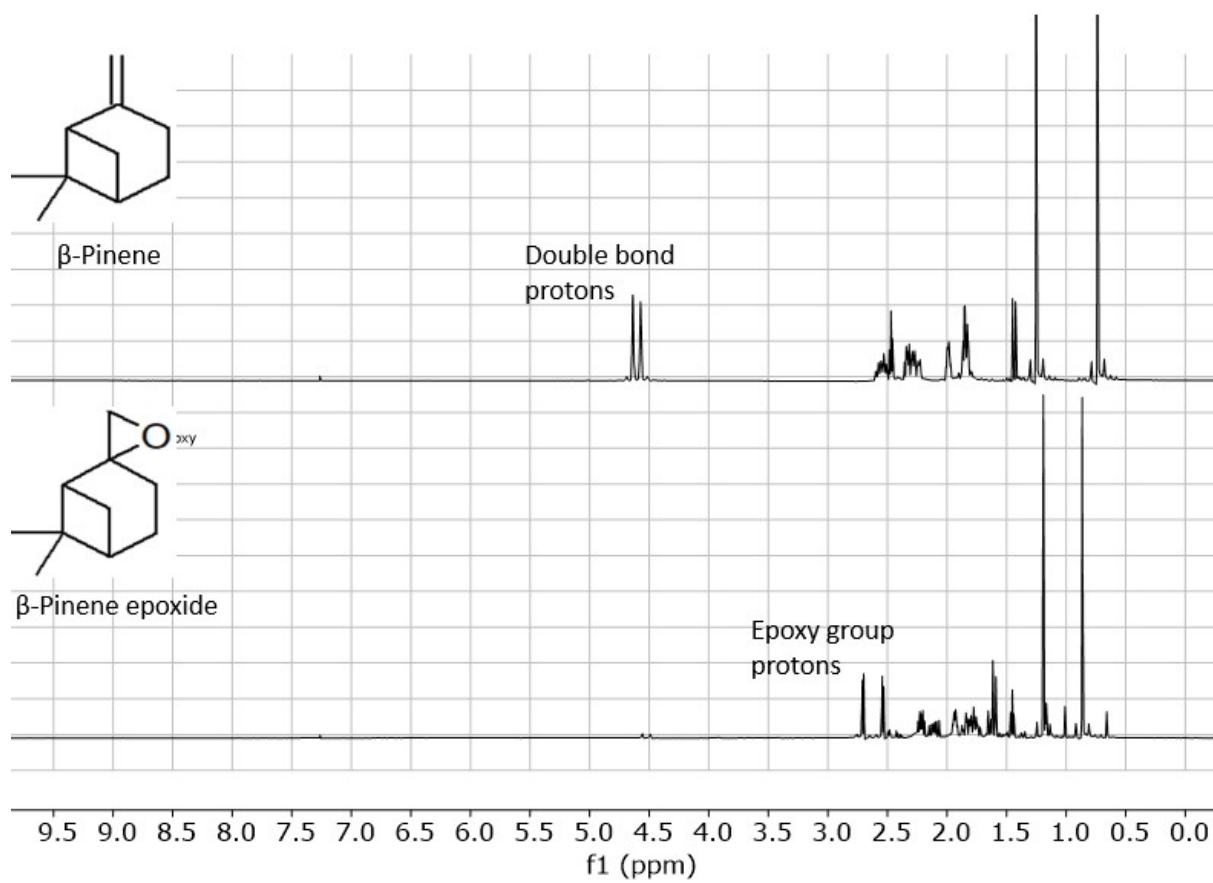

**Scheme S2.** Proton NMR of  $\beta$ -pinene and its epoxidation product ( $\beta$ -pinene epoxide)

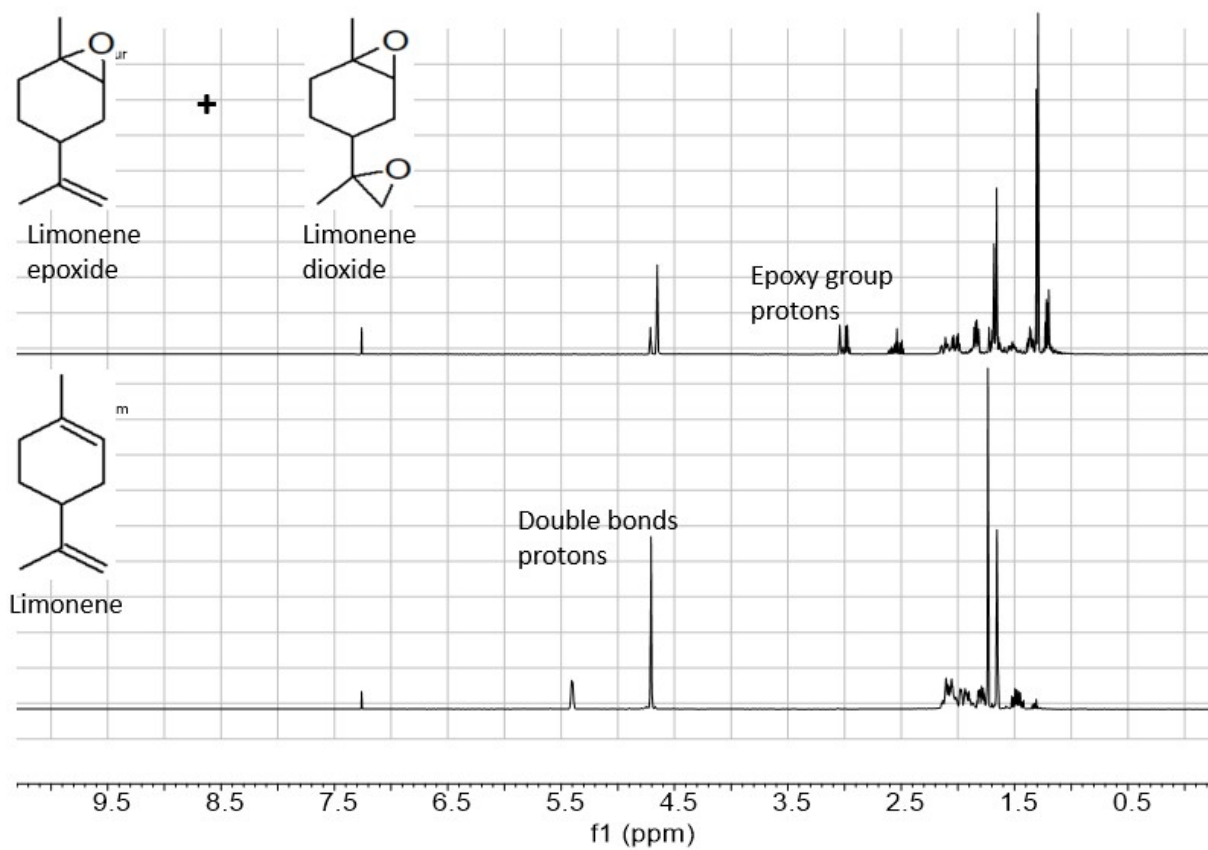

**Scheme S3.** Proton NMR of R-limonene and its epoxidation products (mono- and diepoxide of limonene)

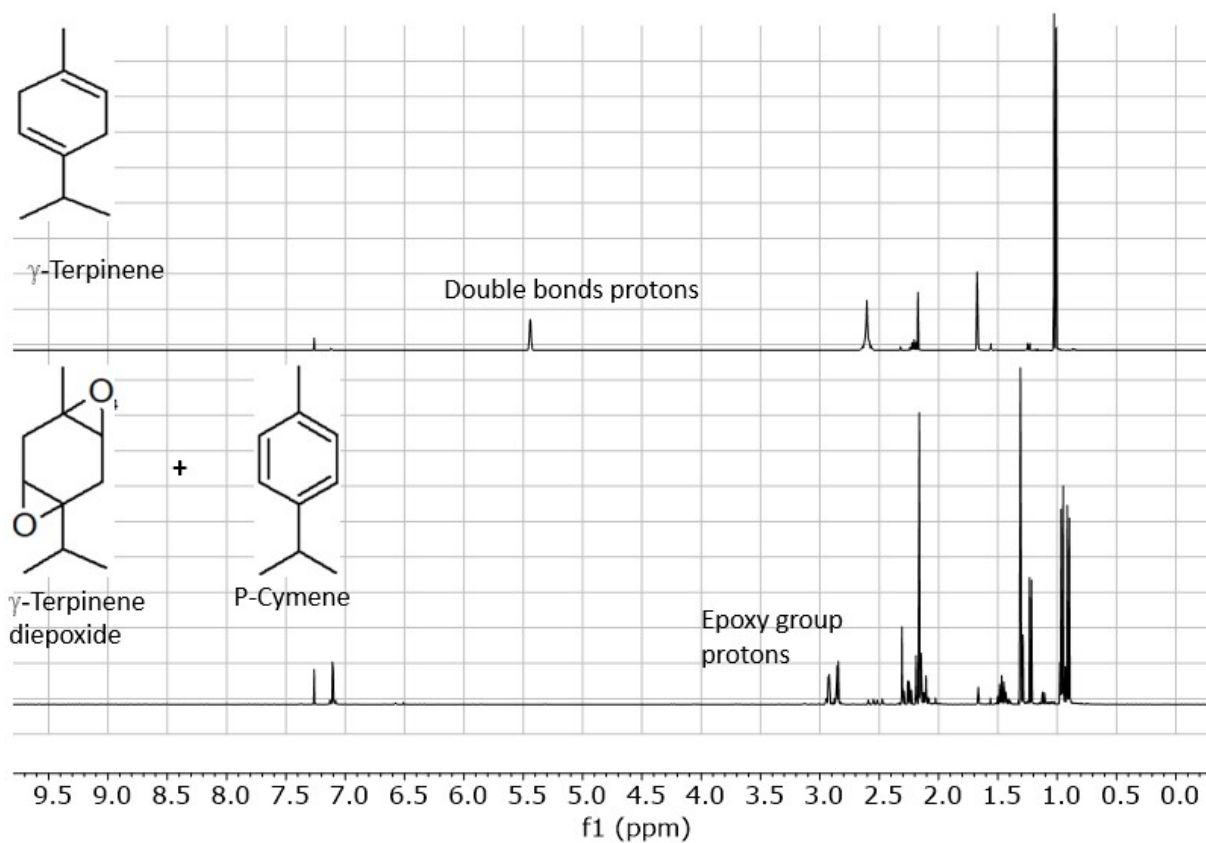

**Scheme S4.** Proton NMR of  $\gamma$ -terpinene and its epoxidation products ( $\gamma$ -terpinene diepoxide and p-cymene)

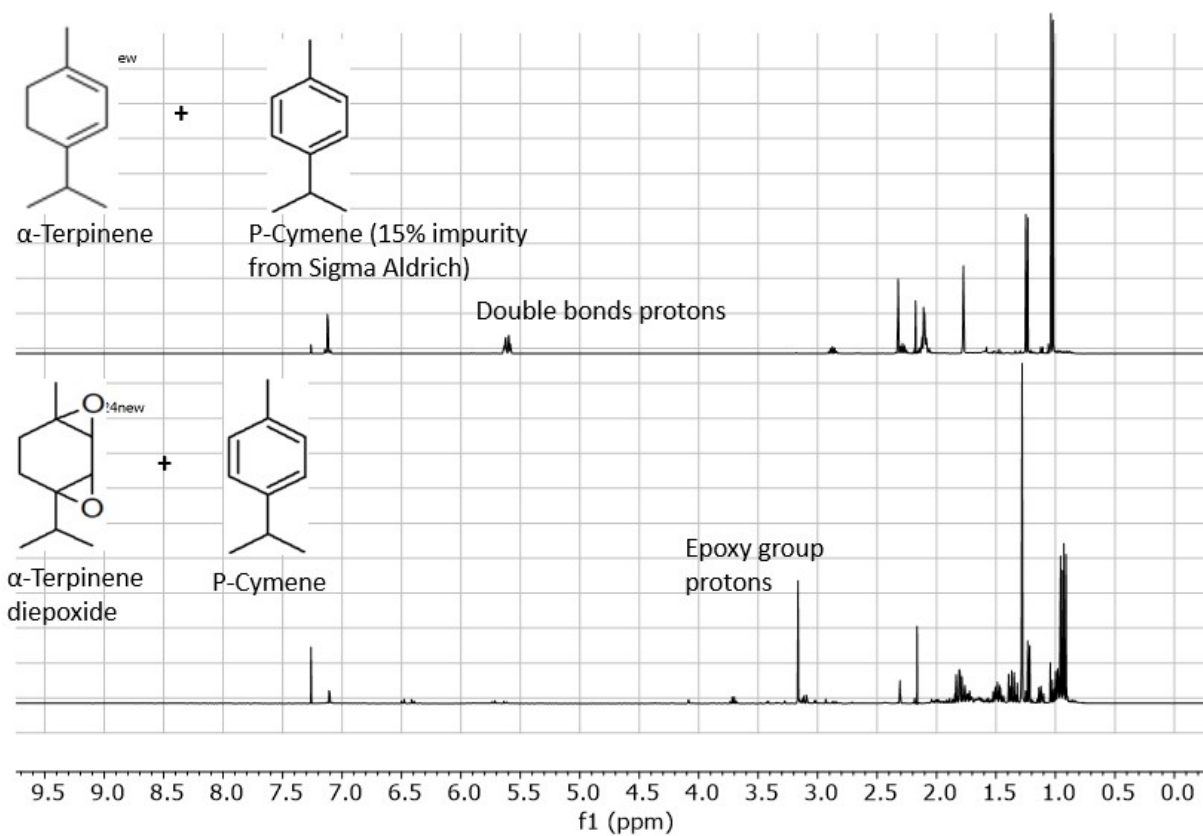

**Scheme S5.** Proton NRM of  $\alpha$ -terpinene and its epoxidation product ( $\alpha$ -terpinene diepoxide)

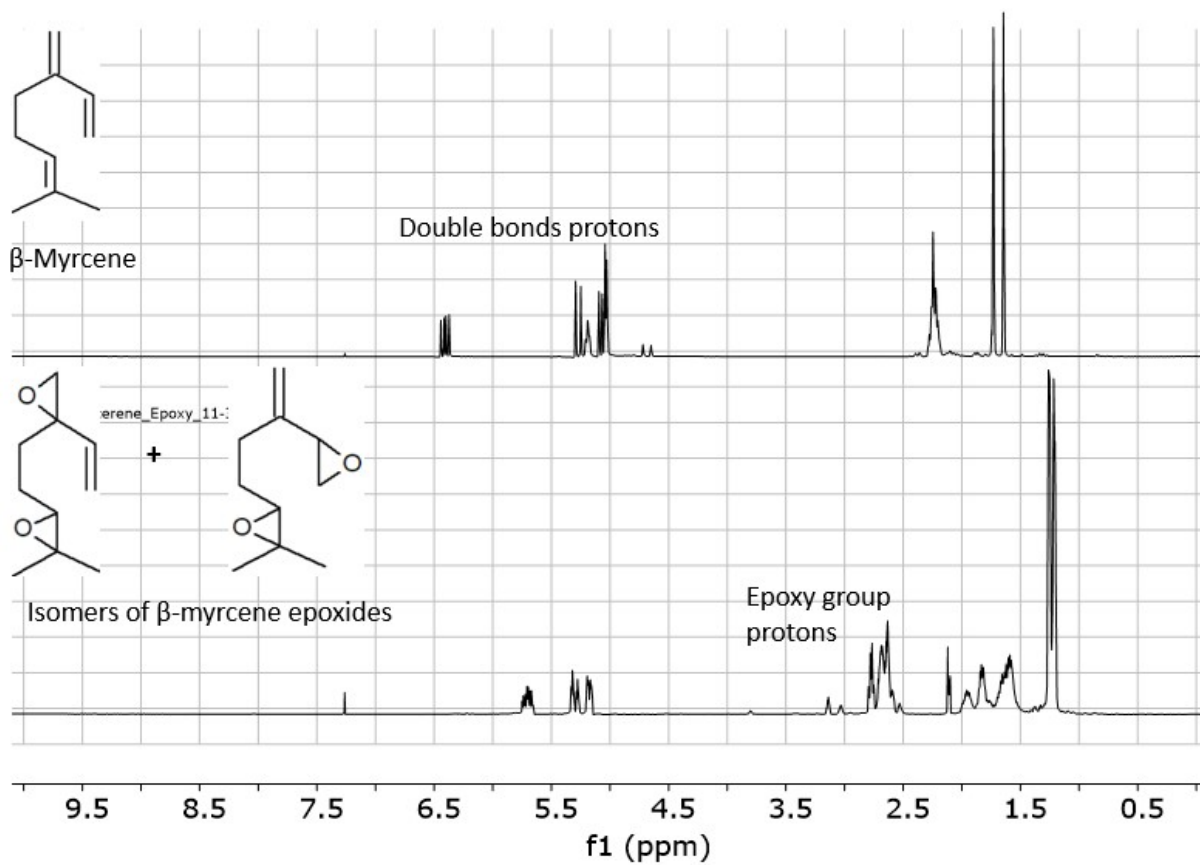

**Scheme S6.** Proton NMR of  $\beta$ -myrcene and its epoxidation products (isomers of  $\beta$ -myrcene diepoxyde)

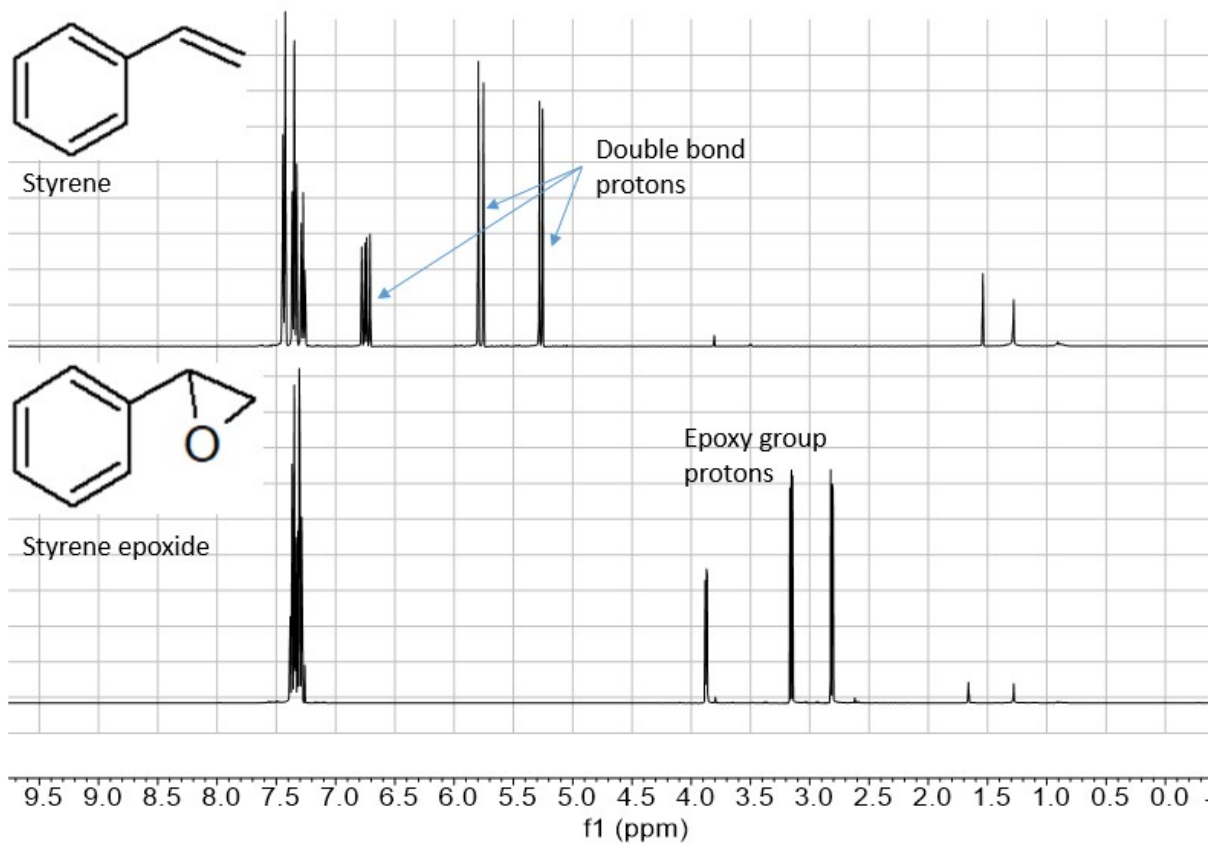

**Scheme S7.** Proton NMR of styrene and its epoxidation products (styrene epoxide)
